# Supplementary material
Source: Springer Nature journal article supplement (https://www.springermedizin.de/resource/supplementary/12958_2010_733_MOESM1_ESM.pdf/9568354)

# FSH

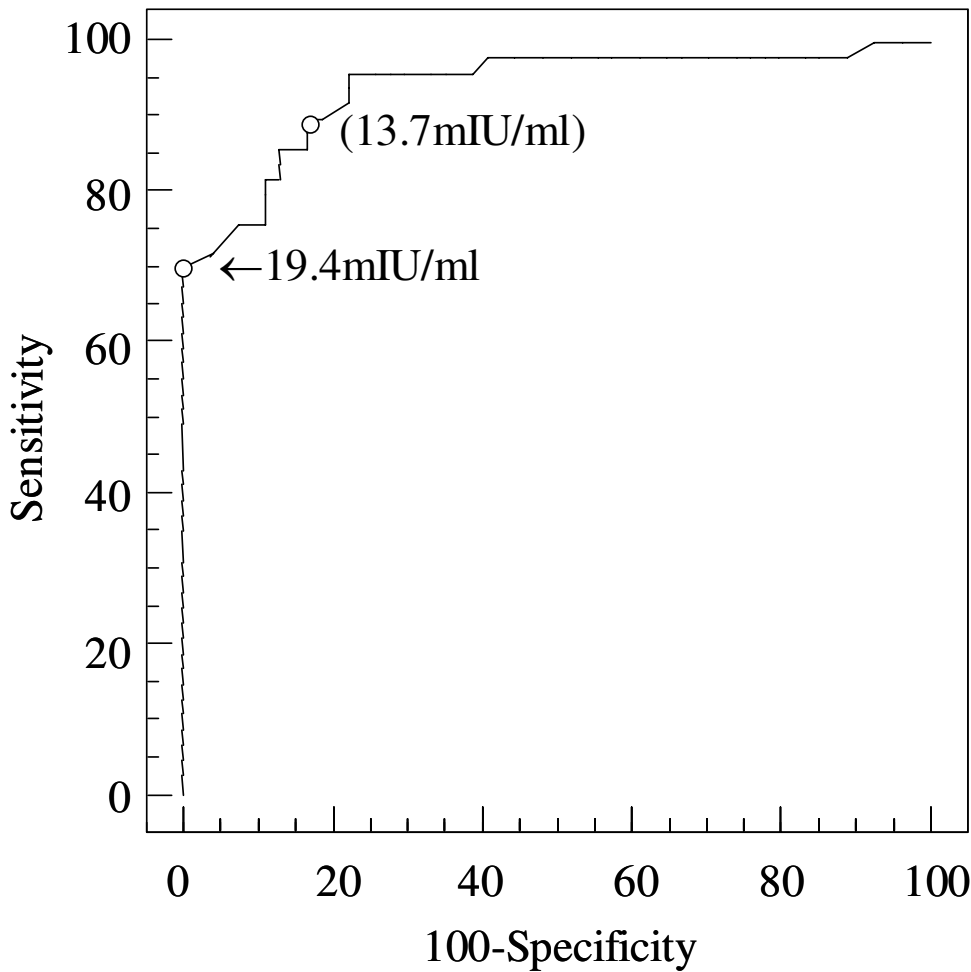

Supplement: MOESM1 [file 9568354]
